# Supplementary figures and images for: Determining growth rates from bright-field images of budding cells through identifying overlaps
Source: eLife journal article supplement (doi:10.7554/elife.79812), 2023-07-07

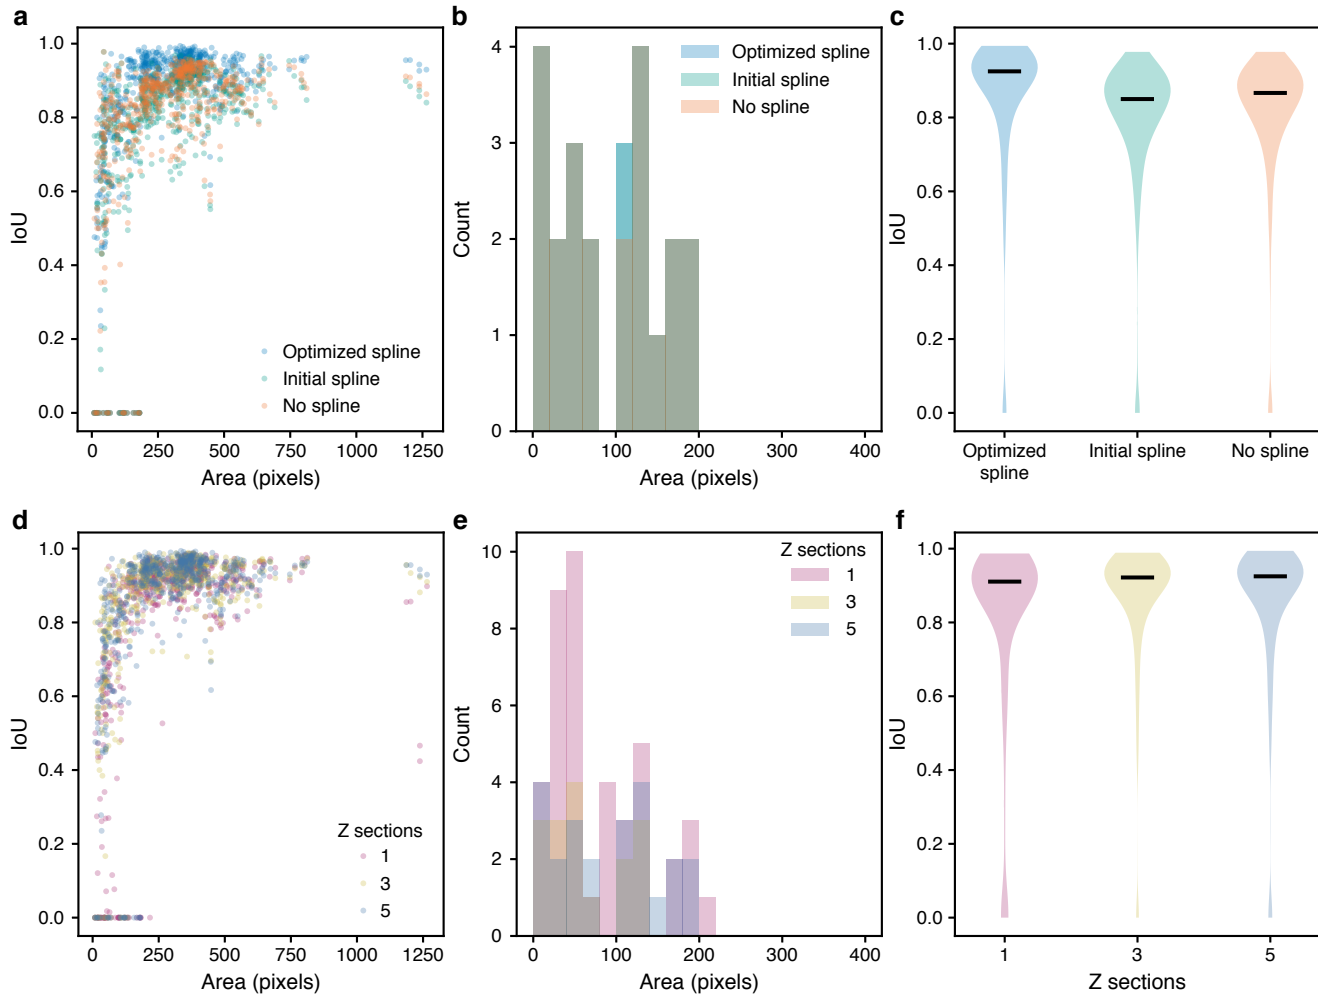

Supplement: supp [file elife-79812-supp-v1.zip]

**a**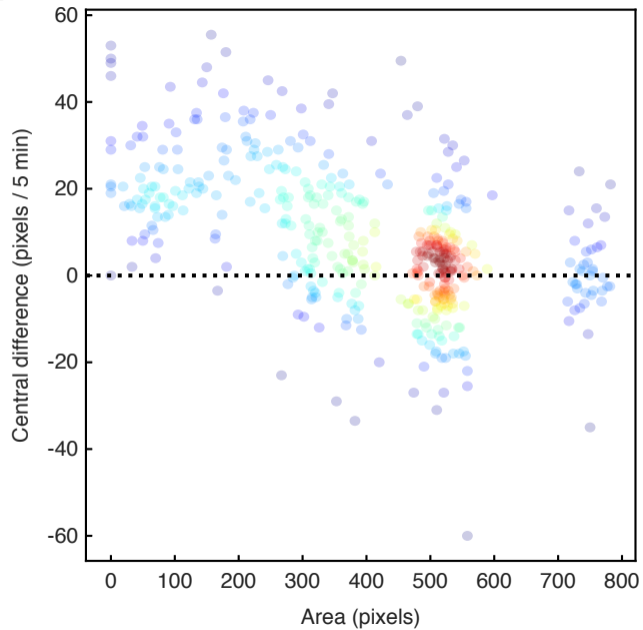**b**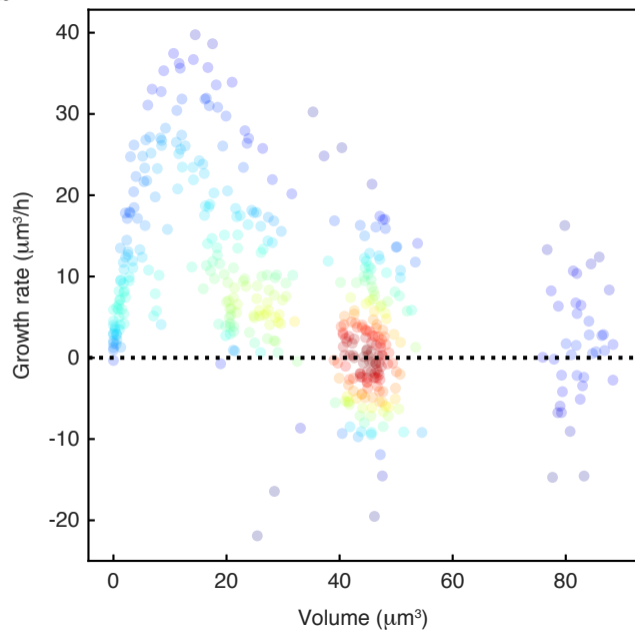

Supplement: supp [file elife-79812-supp-v1.zip]

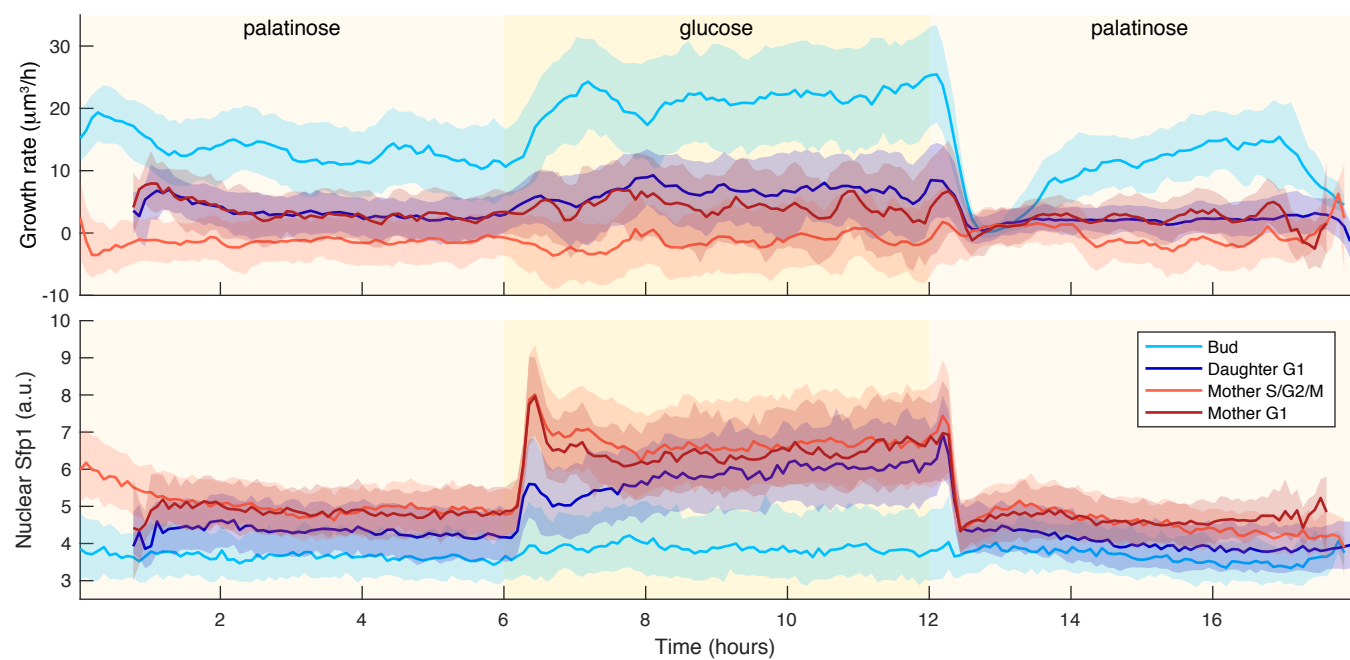

Supplement: supp [file elife-79812-supp-v1.zip]

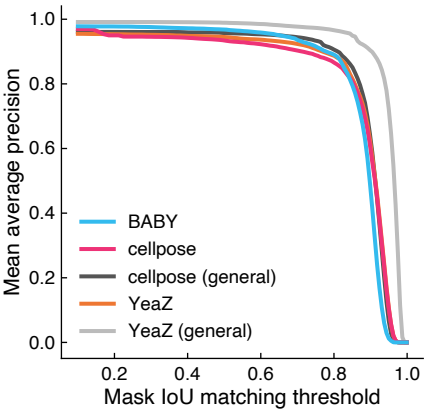

Supplement: supp [file elife-79812-supp-v1.zip]

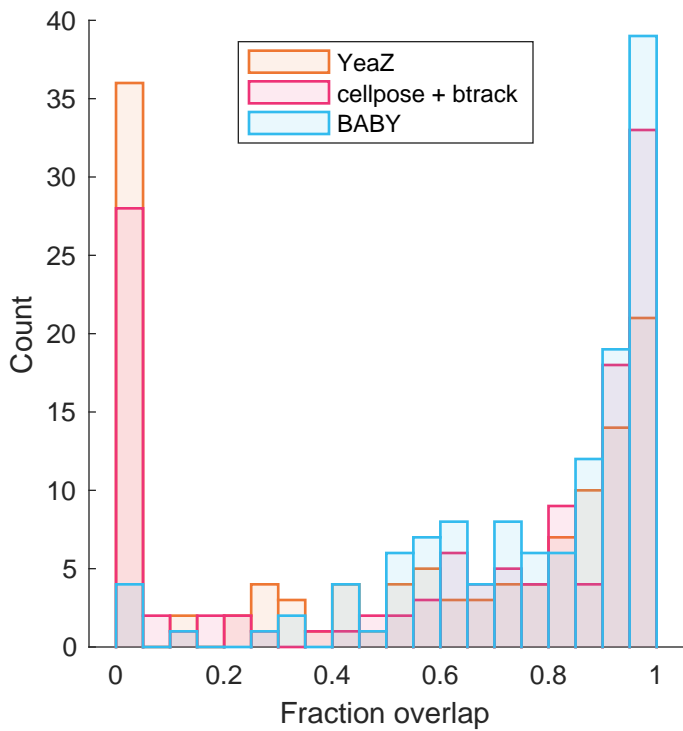

Supplement: supp [file elife-79812-supp-v1.zip]

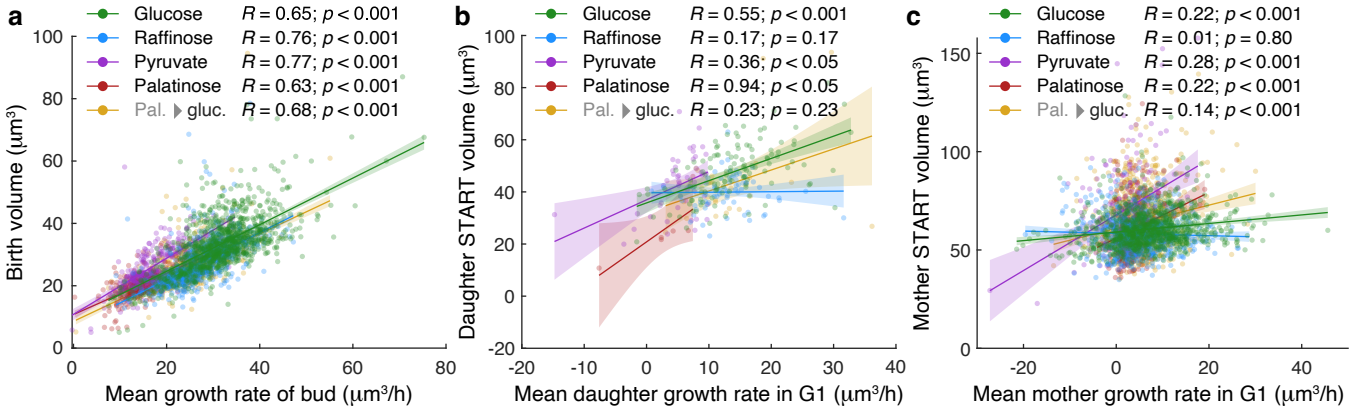

Supplement: supp [file elife-79812-supp-v1.zip]

Bright-field

Ground truth

BABY

cellpose

YeaZ

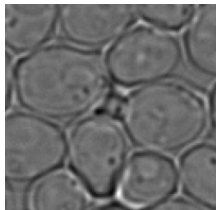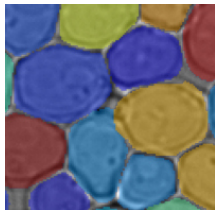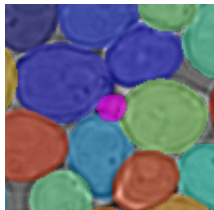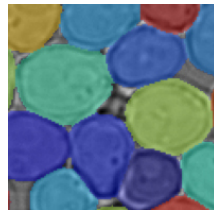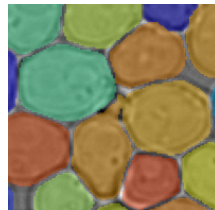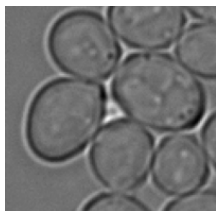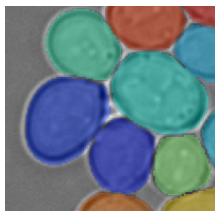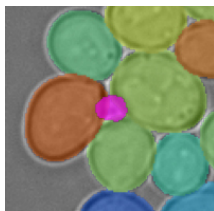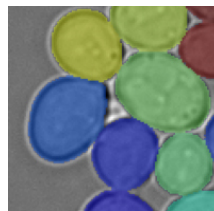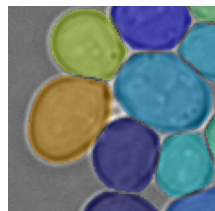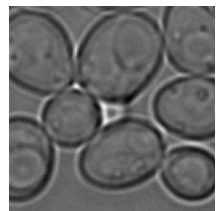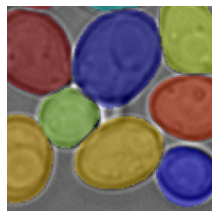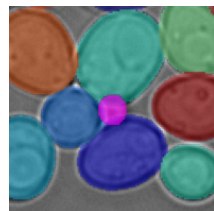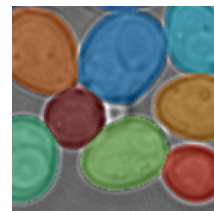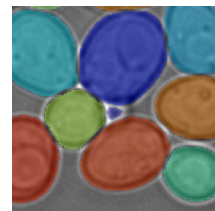

Supplement: supp [file elife-79812-supp-v1.zip]

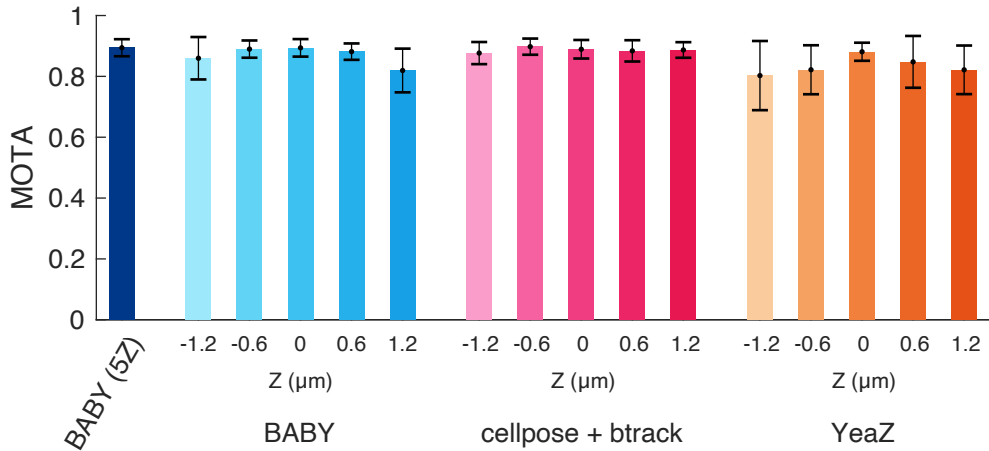

Supplement: supp [file elife-79812-supp-v1.zip]

**a**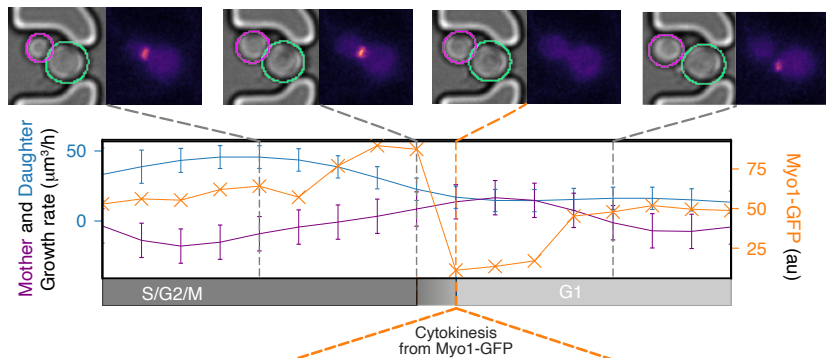**b**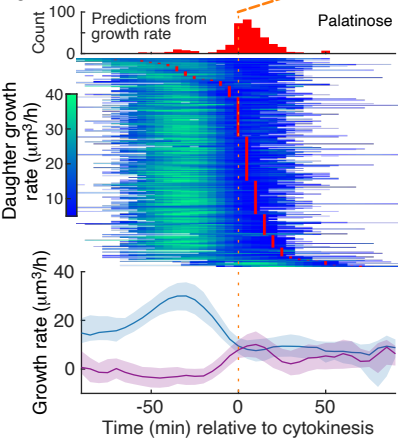**c**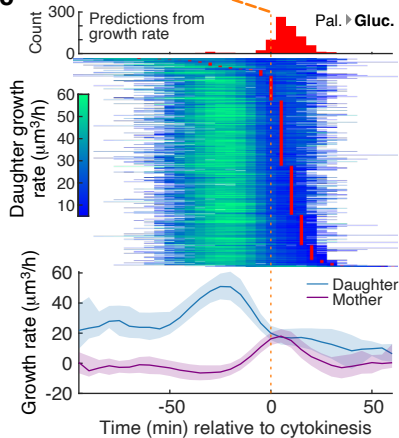**d**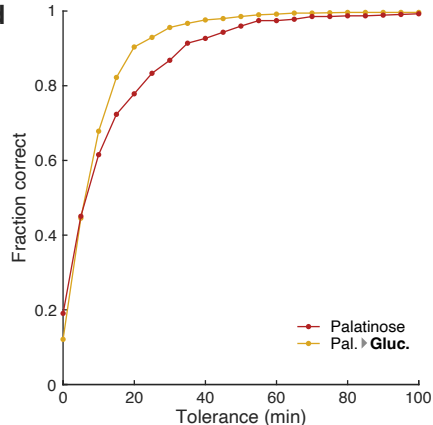**e**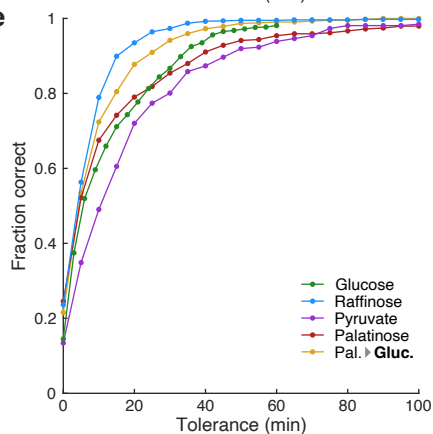

Supplement: supp [file elife-79812-supp-v1.zip]

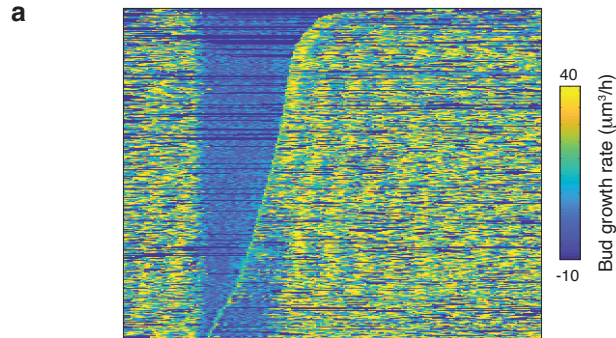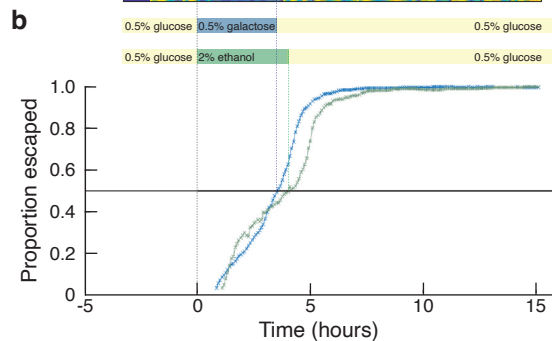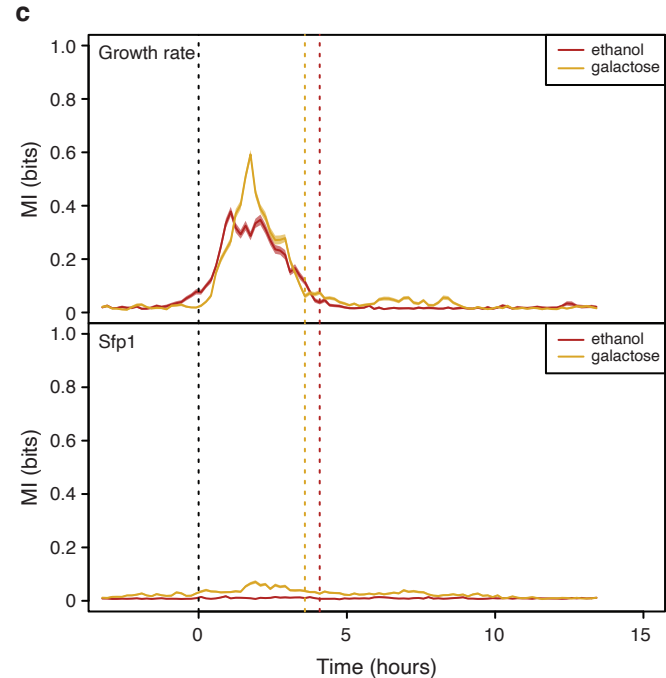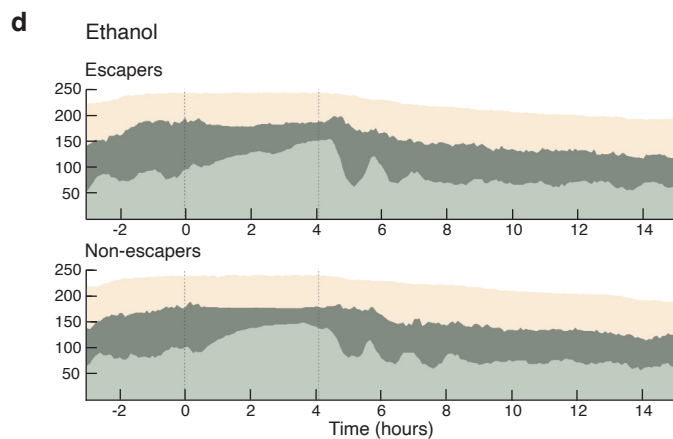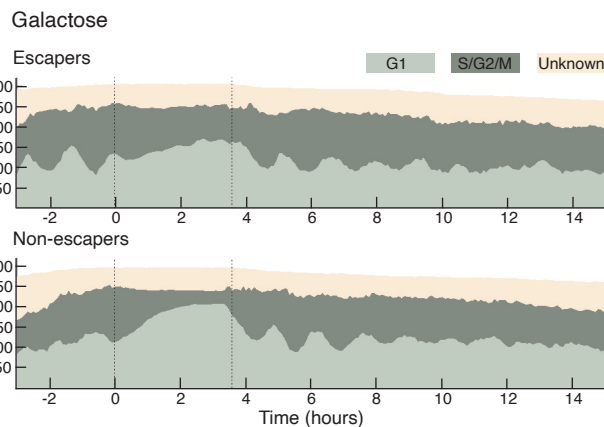

Supplement: supp [file elife-79812-supp-v1.zip]
